# Supplementary material for: Quantifying the barrier lowering of ZnO Schottky nanodevices under UV light
Source: PubMed Central journal article supplement (PMC4601028; doi:10.1038/srep15123), 2015-10-12
Supplement: srep15123-s1.pdf [file srep15123-s1.pdf]

# Supplementary Information

## Quantifying the barrier lowering of ZnO Schottky nanodevices under UV light

Ming-Yen Lu<sup>1,2</sup>, Ming-Pei Lu<sup>3</sup>, Shuen-Jium You<sup>1</sup>, Chieh-Wei Chen<sup>1</sup>, and Ying-Jhe Wang<sup>1</sup>

<sup>1</sup> Graduate Institute of Opto-Mechatronics, National Chung Cheng University, Chia-yi 62102, Taiwan

<sup>2</sup> Advanced Institute of Manufacturing with High-Tech Innovations, National Chung Cheng University, Chia-Yi 62102, Taiwan

<sup>3</sup> National Nano Device Laboratories, Hsinchu 300, Taiwan

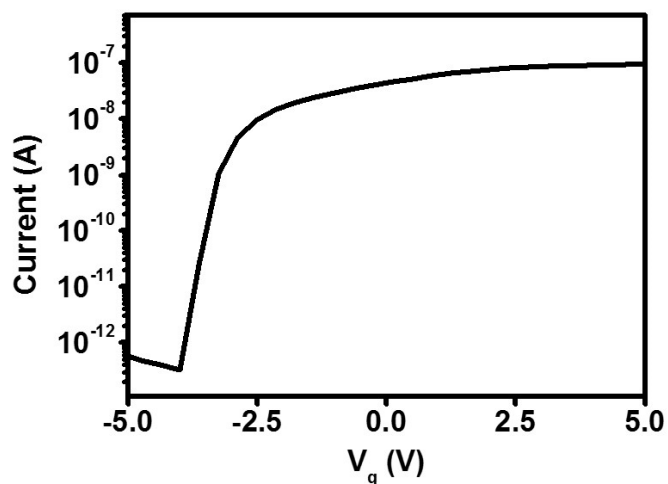

**Figure S1.**  $I_d$ - $V_g$  curve of ZnO NW ohmic device recorded at a value of  $V_d$  of 1V

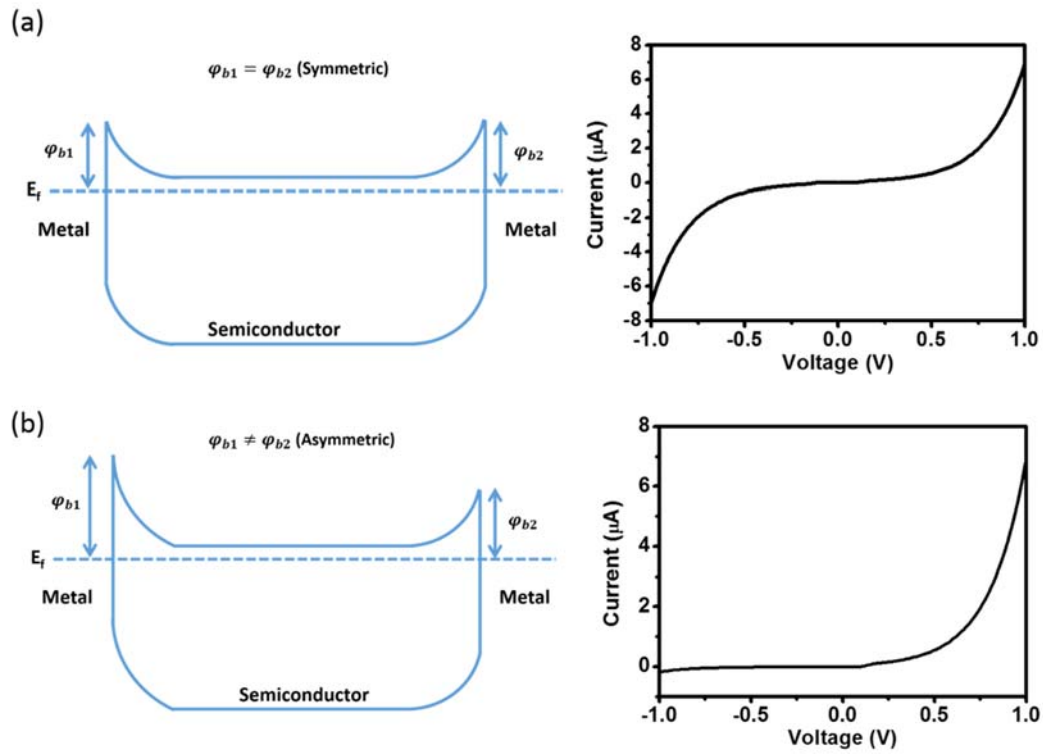

**Figure S2.** The band diagrams of the back-to-back Schottky device with (a) the same SBHs and (b) uneven SBHs. The corresponding simulated I-V curves are symmetric and asymmetric, respectively.

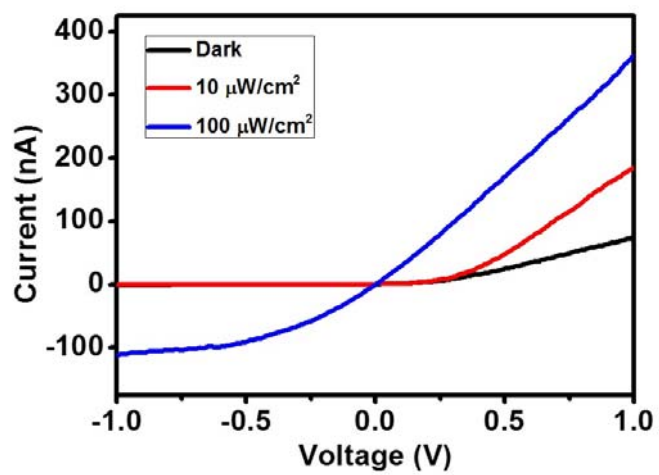

**Figure S3.** I-V curves of ZnO NW Schottky device at dark state and under 10 and 100  $\mu\text{W}/\text{cm}^2$  UV light illuminations.

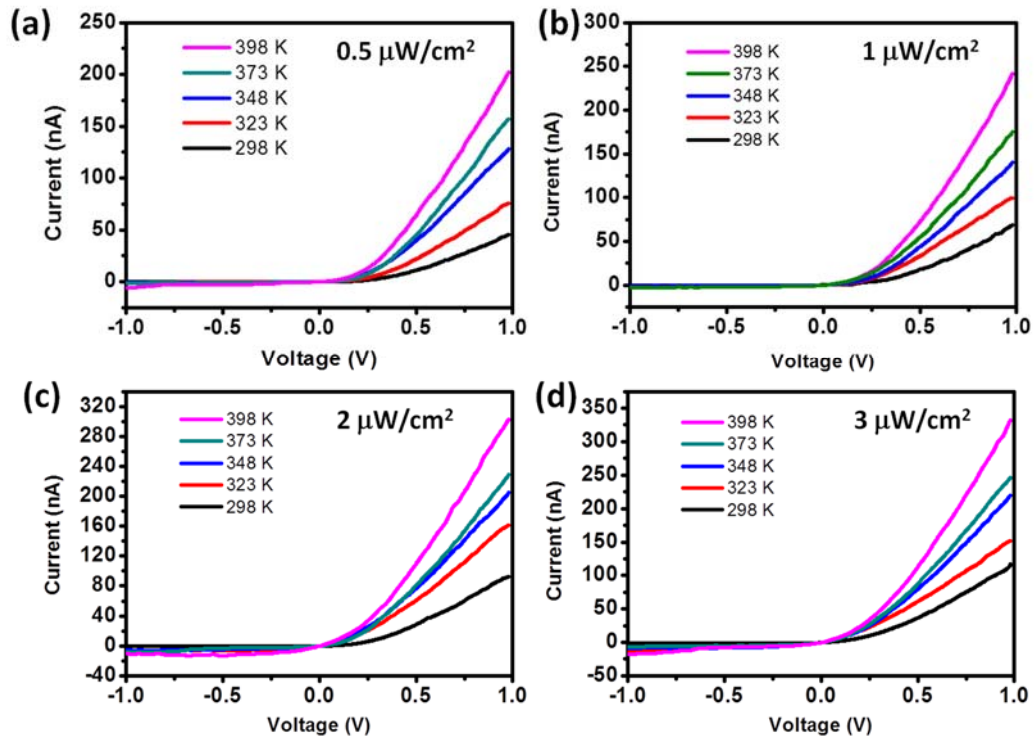

**Figure S4.** *I-V* curves of the Schottky device measured at temperatures ranging from 298 to 398 K under different UV illumination power density, (a) 0.5  $\mu\text{W}/\text{cm}^2$ , (b) 1  $\mu\text{W}/\text{cm}^2$ , (c) 2  $\mu\text{W}/\text{cm}^2$ , and (d) 3  $\mu\text{W}/\text{cm}^2$ .

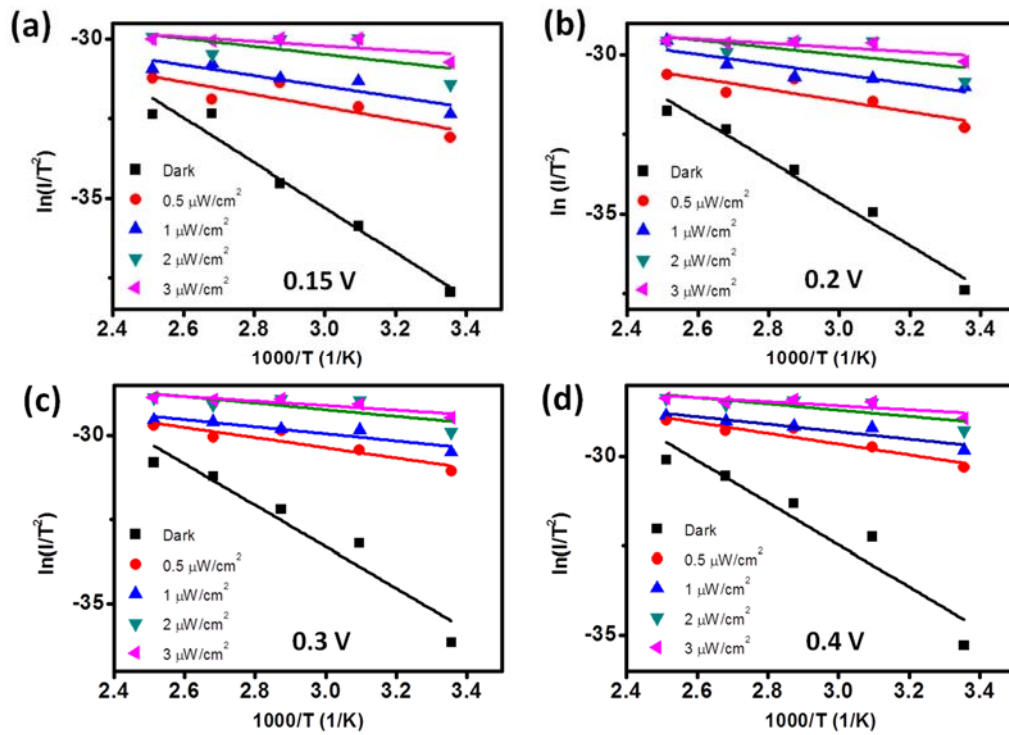

**Figure S5.** Plots of  $\ln(I/T^2)$  versus  $1000/T$  of devices measured under different UV illuminated power density, the data are extracted from Fig. S1 at (a)  $V = 0.15$  V, (b)  $V = 0.2$  V, (c)  $V = 0.3$  V, and (d)  $V = 0.4$  V.
